# Supplementary material for: A resonance spacer cation-based heterostructure enables efficient and stable perovskite solar cells
Source: Royal Society of Chemistry journal article supplement (doi:10.1039/d4ta00394b), 2024-01-01
Supplement: d4ta00394b1.pdf [file d4ta00394b1.pdf]

# Resonance Spacer Cation-based Heterostructure Enables Efficient and Stable Perovskite Solar Cells

Zijian Deng <sup>a</sup>, Xichuan Yang <sup>a,\*</sup>, Qingning Hou <sup>a</sup>, Miao Jiang <sup>a</sup>, Huhu Liang <sup>a</sup>, Shukang Li <sup>a</sup>, Mengde Zhai <sup>b</sup>, Haoxin Wang <sup>b</sup>, Ming Cheng <sup>b,\*</sup>, Li Zhang <sup>c</sup>, and Licheng Sun <sup>d</sup>

<sup>a</sup> Institute of Artificial Photosynthesis, State Key Laboratory of Fine Chemicals, Dalian University of Technology (DUT), 116024 Dalian, China.

<sup>b</sup> Institute for Energy Research, Jiangsu University, Zhenjiang 212013, China.

<sup>c</sup> Nanjing University of Posts and Telecommunications, 210003, China.

<sup>d</sup> Center of Artificial Photosynthesis for Solar Fuels, School of Science, Westlake University, Hangzhou 310024, China.

\* E-mail: [yangxc@dlut.edu.cn](mailto:yangxc@dlut.edu.cn) (Xichuan Yang)

[mingcheng@ujs.edu.cn](mailto:mingcheng@ujs.edu.cn) (Ming Cheng)

## Experimental section

### General Information

SEM was performed with FEI (field Emission Instruments: Nova Nano SEM 450), USA. The UV-vis spectroscopy measurements were recorded with an Agilent 8453 spectrophotometer. The *J-V* characteristics of the solar cells were recorded by a Keithley 2400 source measure unit under the AM 1.5G (100 mW cm<sup>-2</sup>) simulated sunlight, Oriel Sol3A solar simulator (Newport USA, Model: 94023A). Before measurement, the light intensity was calibrated with a Newport calibrated standard Si reference cell (SER. No: 506/0358). A metal mask (0.1 cm<sup>2</sup>) was applied when being recorded. The *J-V* curves were obtained (1.3 V to -0.1 V) at the scan rate of 50 mV s<sup>-1</sup>. The incident photo-to-current conversion efficiency (IPCE) measurements were obtained by a Hypermono-light (SM-25, Jasco Co. Ltd./ Japan). Prior to measurement, a standard silicon solar cell was used as reference. UPS was measured with a negative bias voltage (-10 V) applied to the samples using the He(I) (21.22 eV) line in order to shift the spectra from the spectrometer threshold. TPV, IMPS, IMVS, EIS, and dark-CELIV measurements were performed on the Paios, Fluxim AG. TPV curves were measured at 100% offset Intensity, with a pulse length of 15 s, and a follow-up time of 5 s. IMPS and IMVS curves were measured at 90% offset intensity, with an amplitude of 10% offset intensity, the frequency from 1 MHz to 10 Hz. The scan range of EIS

was from 10 MHz to 1 Hz. The dark-CELIV with a sweep ramp rate of 10 V/ms, and the maximum voltage was 3 V. The PL was recorded by FluoroMax-4P (Horiba Jobin Yvon).  $^1\text{H}$  and  $^{13}\text{C}$  NMR spectroscopy measurements were recorded on a Bruker Avance II 400 spectrometer. In  $^1\text{H}$  NMR spectroscopy measurements, the concentrations of AT, AMTI, ABT, and AMBTI are all 0.04 M in DMSO- $d_6$ , and all spectra were calibrated using the DMSO- $d_6$  peak at 2.5 ppm. In  $^{13}\text{C}$  NMR spectroscopy measurements, all spectra were calibrated using the DMSO- $d_6$  peak at 39.6 ppm. High-resolution mass spectrometry was performed on the Agilent 6230B instrument.

TRPL (FLS1000 Edinburgh Instruments), XRD (D8 Advance, Bruker corporation), and c-AFM (JPK Nanowizard 4XP, Bruker, Germany) data were obtained using equipment maintained by Instrumental Analysis Center, Dalian University of Technology.

## **DFT Calculation**

### **ESP:**

We ran density functional theory (DFT) B3LYP/6-311+G calculations for the determination of the electrostatic surface potential of  $\text{AMT}^+$  and  $\text{AMBT}^+$ .

### **2D mode:**

We have employed the Vienna Ab initio Simulation Package (VASP) to perform all density functional theory (DFT) calculations within spin-polarized frame. The elemental core and valence electrons were represented by the projector augmented wave (PAW) method and plane-wave basis functions with a cutoff energy of 450 eV. Generalized gradient approximation with the Perdew-Burke-Ernzerhof (GGA-PBE) exchange-correlation functional was employed in all the calculations. Geometry optimizations were performed with the force convergency smaller than 0.05 eV/Å. The DFT-D3 empirical correction method was employed to describe van der Waals interactions. Monkhorst-Pack k-points of  $3\times 3\times 1$  were applied for all the calculations. Atoms at bottom are fixed in all the calculation.

## Materials

Dimethylformamide (DMF), dimethyl sulfoxide (DMSO), chlorobenzene (CB), 2-Aminothiazole, and 2-Benzothiazolamine were purchased from Energy chemical (98.0%). Poly(acrylic acid) (paa, M.W ~ 450000) was purchased from Macklin. Tin (IV) oxide colloid dispersion (15 wt%), formamidine iodide (FAI), lead iodide (PbI<sub>2</sub>), and Cesium iodide (CsI) were purchased from Advanced Election Technology Co., Ltd. FK 209 Co(III), 4-tertbutylpyridine (t-BuPy), and lithium bis(trifluoromethanesulfonyl)imide (Li-TFSI) were purchased from Xi'an Polymer Light Technology in China. Spiro-OMeTAD was purchased from Dalian HeptaChroma SolarTech Co., Ltd. All chemicals were used without further purification.

## Solution preparation

The paa-QD-SnO<sub>2</sub> precursor solution contains 4 ml of Tin (IV) oxide colloid dispersion (15 wt%), 100 ml of water and 40 mg of Poly (acrylic acid) (paa, M.W ~ 450000).<sup>1</sup>

FA<sub>0.88</sub>Cs<sub>0.12</sub>PbI<sub>3</sub> perovskite precursor solutions (1.25 M) were prepared by directly dissolving 495.6 mg PbI<sub>2</sub>, 151.4 mg FAI, 31.2 mg CsI, 13 mg MACl into 0.8 mL anhydrous DMF:DMSO with a volume ratio of 8:1. The Spiro-OMeTAD solution was prepared by mixing 73.5 mg Spiro-OMeTAD, 17.5  $\mu$ L Li-TFSI solution (520 mg Li-TFSI in 1 mL acetonitrile), 28.8  $\mu$ L tBP, and 29  $\mu$ L FK 209 Co(III) solution (300 mg in 1 mL acetonitrile) in 1 mL chlorobenzene.

## Perovskite solar cell fabrication

Pre-patterned FTO was cleaned in soapy water, deionized water, acetone and ethanol with sonication and then all substrates were UV-ozone cleaned for 30 min subsequently before further use, and then deposited with a thin compact TiO<sub>2</sub> layer by spray pyrolysis using 0.2 M Ti(acac)<sub>2</sub>OiPr<sub>2</sub> in EtOH solution at 500 °C. The sprayed film was annealed at 500 °C for 30 min. And tin oxide was utilized as electron transport material. And the solution was spun onto the glass/compact TiO<sub>2</sub> substrate surface at 4000 rpm for 30 s, and then baked on a hotplate in ambient atmosphere at 160 °C for 30 min. Then

substrates were UV-ozone cleaned for 30 min subsequently before depositing perovskite. The perovskite solution was spin-coated in a two-step program at 1000 and 5000 rpm for 10 and 30 s, respectively. During the second step, 150  $\mu\text{L}$  of chlorobenzene was poured on the spinning substrate 15 s prior to the end of the program. The wet film was annealed at 100°C for 60 min. For the AMTI or AMBTI-modified samples, the IPA solution of 2 mg/ml AMTI or 2 mg/ml AMBTI was coated on the cooled substrate at 1500 rpm for 30 s by dynamic spin-coating, then annealed at 100 °C for 5 min, repeated several times (The rationale behind adopting this approach is rooted in the fact that both substances have a limited solubility in IPA), the number of modifications for 1D/3D and 2D/3D is once and twice, respectively (see **Fig. S11** and **Tab. S4**), in all of tests. After the perovskite cooled down to room temperature, the spiro-OMeTAD was spin-coated at 3000 rpm for 30 s. Finally, 100 nm of the silver top electrode was thermally evaporated under  $7 \times 10^{-4}$  Pa vacuum. All the procedures were completed in ambient environment with relative humidity below 25%.

## Synthetic procedures

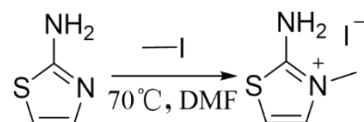

### 2-amino-3-methylthiazol-3-ium iodide (AMTI):

2.0 g 2-Aminothiazole and 2 ml  $\text{CH}_3\text{I}$  were dissolved in 30 ml DMF and kept stirring for 4 hours at 70 °C. After cooling to room temperature, the crude product was separated out with  $\text{CH}_2\text{Cl}_2$ . And then further purified by recrystallization (1.31 g, 65%), with methanol and ether as the benign solvent and the poor solvent, respectively.  $^1\text{H}$  NMR (400 MHz, DMSO- $d_6$ )  $\delta$  9.32 (s, 2H), 7.40 (d,  $J = 4.5$  Hz, 1H), 7.00 (d,  $J = 4.5$  Hz, 1H), 3.58 (s, 3H).  $^{13}\text{C}$  NMR (400 MHz, DMSO- $d_6$ )  $\delta$  167.99, 131.13, 107.27, 35.51. Mass spectrum  $m/z$  calculated for  $\text{C}_4\text{H}_7\text{N}_2\text{S}^+$ : 115.0324; found, 115.0328.

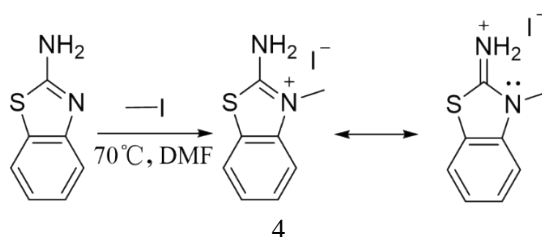

**2-amino-3-methylbenzo[d]thiazol-3-ium iodide (AMBTI):**

3.0 g 2-Benzothiazolamine and 2 ml  $\text{CH}_3\text{I}$  were dissolved in 50 ml DMF and kept stirring for 4 hours at 70 °C. After cooling to room temperature, the crude product was separated out with  $\text{CH}_2\text{Cl}_2$ . And then further purified by recrystallization (1.83 g, 61%), with methanol and ether as the benign solvent and the poor solvent, respectively.  $^1\text{H}$  NMR (400 MHz, DMSO- $d_6$ )  $\delta$  9.99 (s, 2H), 8.00 (d,  $J$  = 7.9 Hz, 1H), 7.68 (d,  $J$  = 8.1 Hz, 1H), 7.58 (td,  $J$  = 7.6, 1.2 Hz, 1H), 7.43 (td,  $J$  = 8.0, 0.8 Hz, 1H), 3.73 (s, 3H).  $^{13}\text{C}$  NMR (400 MHz, DMSO- $d_6$ )  $\delta$  168.07, 138.99, 127.79, 125.21, 123.59, 122.26, 111.43, 32.39. Mass spectrum  $m/z$  calculated for  $\text{C}_8\text{H}_9\text{N}_2\text{S}^+$ : 165.0481; found, 165.0424.

**AMTPbI<sub>3</sub>:**

242 mg AMTI and 461 mg  $\text{PbI}_2$  were dissolved in 1 ml DMF and kept stirring for 1 hour at 100 °C. After cooling, transfer it into a methanol atmosphere and induce crystallization through solvent diffusion at 65 °C.

**AMBTpbi<sub>3</sub>·2DMF**

146 mg AMBTI and 230.5 mg  $\text{PbI}_2$  were dissolved in 2 ml DMF and kept stirring for 1 hour at 100 °C. Crystals AMBTpbi<sub>3</sub>·2DMF can be obtained by natural cooling and standing for 2 hours.

**(AMBT)<sub>2</sub>PbI<sub>4</sub>:**

73 mg AMBTI and 115.2 mg  $\text{PbI}_2$  were dissolved in 5 ml DMF and kept stirring for 1 hour at 60 °C. (AMBT)<sub>2</sub>PbI<sub>4</sub> film was obtained by spin-coating on the glass annealed at 150 °C for 10 minutes.

**Table S1.** Details of X-ray crystallographic parameters of AMTPbI<sub>3</sub>.

|                                                |                                                                 |
|------------------------------------------------|-----------------------------------------------------------------|
| CCDC Number                                    | CCDC:2310300                                                    |
| Empirical formula                              | C <sub>4</sub> H <sub>7</sub> I <sub>3</sub> N <sub>2</sub> PbS |
| Formula weight                                 | 703.07                                                          |
| Temperature/K                                  | 99.2(2)                                                         |
| Crystal system                                 | orthorhombic                                                    |
| Space group                                    | Pna2 <sub>1</sub>                                               |
| a/Å                                            | 14.7651(4)                                                      |
| b/Å                                            | 9.7520(3)                                                       |
| c/Å                                            | 8.6221(3)                                                       |
| $\alpha/^\circ$                                | 90                                                              |
| $\beta/^\circ$                                 | 90                                                              |
| $\gamma/^\circ$                                | 90                                                              |
| Volume/Å <sup>3</sup>                          | 1241.49(7)                                                      |
| Z                                              | 4                                                               |
| $\rho_{\text{calc}}/\text{g/cm}^3$             | 3.762                                                           |
| $\mu/\text{mm}^{-1}$                           | 21.172                                                          |
| F(000)                                         | 1208.0                                                          |
| Crystal size/mm <sup>3</sup>                   | 0.1 × 0.1 × 0.08                                                |
| Radiation                                      | Mo K $\alpha$ ( $\lambda$ = 0.71073)                            |
| 2 $\Theta$ range for data collection/ $^\circ$ | 7.266 to 60.682                                                 |
| Index ranges                                   | -20 ≤ h ≤ 20, -12 ≤ k ≤ 13, -12 ≤ l ≤ 11                        |
| Reflections collected                          | 15809                                                           |
| Independent reflections                        | 3276 [ $R_{\text{int}}$ = 0.0391, $R_{\text{sigma}}$ = 0.0291]  |
| Data/restraints/parameters                     | 3276/1/101                                                      |
| Goodness-of-fit on F <sup>2</sup>              | 1.092                                                           |
| Final R indexes [ $I \geq 2\sigma(I)$ ]        | $R_1$ = 0.0195, $wR_2$ = 0.0439                                 |
| Final R indexes [all data]                     | $R_1$ = 0.0203, $wR_2$ = 0.0442                                 |
| Largest diff. peak/hole / e Å <sup>-3</sup>    | 1.27/-1.46                                                      |
| Flack parameter                                | 0.418(8)                                                        |

**Table S2.** Details of X-ray crystallographic parameters of AMBTPbI<sub>3</sub>·2DMF.

|                                             |                                                                                  |
|---------------------------------------------|----------------------------------------------------------------------------------|
| CCDC Number                                 | CCDC:2242973                                                                     |
| Empirical formula                           | C <sub>14</sub> H <sub>23</sub> I <sub>3</sub> N <sub>4</sub> O <sub>2</sub> PbS |
| Formula weight                              | 899.361                                                                          |
| Temperature/K                               | 296.15                                                                           |
| Crystal system                              | triclinic                                                                        |
| Space group                                 | P-1                                                                              |
| a/Å                                         | 8.2105(7)                                                                        |
| b/Å                                         | 12.7412(11)                                                                      |
| c/Å                                         | 13.2110(12)                                                                      |
| α/°                                         | 113.912(2)                                                                       |
| β/°                                         | 102.036(2)                                                                       |
| γ/°                                         | 93.293(2)                                                                        |
| Volume/Å <sup>3</sup>                       | 1219.95(19)                                                                      |
| Z                                           | 2                                                                                |
| ρ <sub>calc</sub> /g/cm <sup>3</sup>        | 2.448                                                                            |
| μ/mm <sup>-1</sup>                          | 10.812                                                                           |
| F(000)                                      | 809                                                                              |
| Crystal size/mm <sup>3</sup>                | 0.12 × 0.1 × 0.08                                                                |
| Radiation                                   | Mo Kα (λ = 0.71073)                                                              |
| 2Θ range for data collection/°              | 5.14 to 50                                                                       |
| Index ranges                                | -10 ≤ h ≤ 10, -16 ≤ k ≤ 14, -17 ≤ l ≤ 15                                         |
| Reflections collected                       | 8194                                                                             |
| Independent reflections                     | 4168 [R <sub>int</sub> = 0.0263, R <sub>sigma</sub> = 0.0444]                    |
| Data/restraints/parameters                  | 4168/0/230                                                                       |
| Goodness-of-fit on F <sup>2</sup>           | 1.032                                                                            |
| Final R indexes [I ≥ 2σ (I)]                | R <sub>1</sub> = 0.0260, wR <sub>2</sub> = 0.0667                                |
| Final R indexes [all data]                  | R <sub>1</sub> = 0.0305, wR <sub>2</sub> = 0.0698                                |
| Largest diff. peak/hole / e Å <sup>-3</sup> | 0.92/-0.66                                                                       |

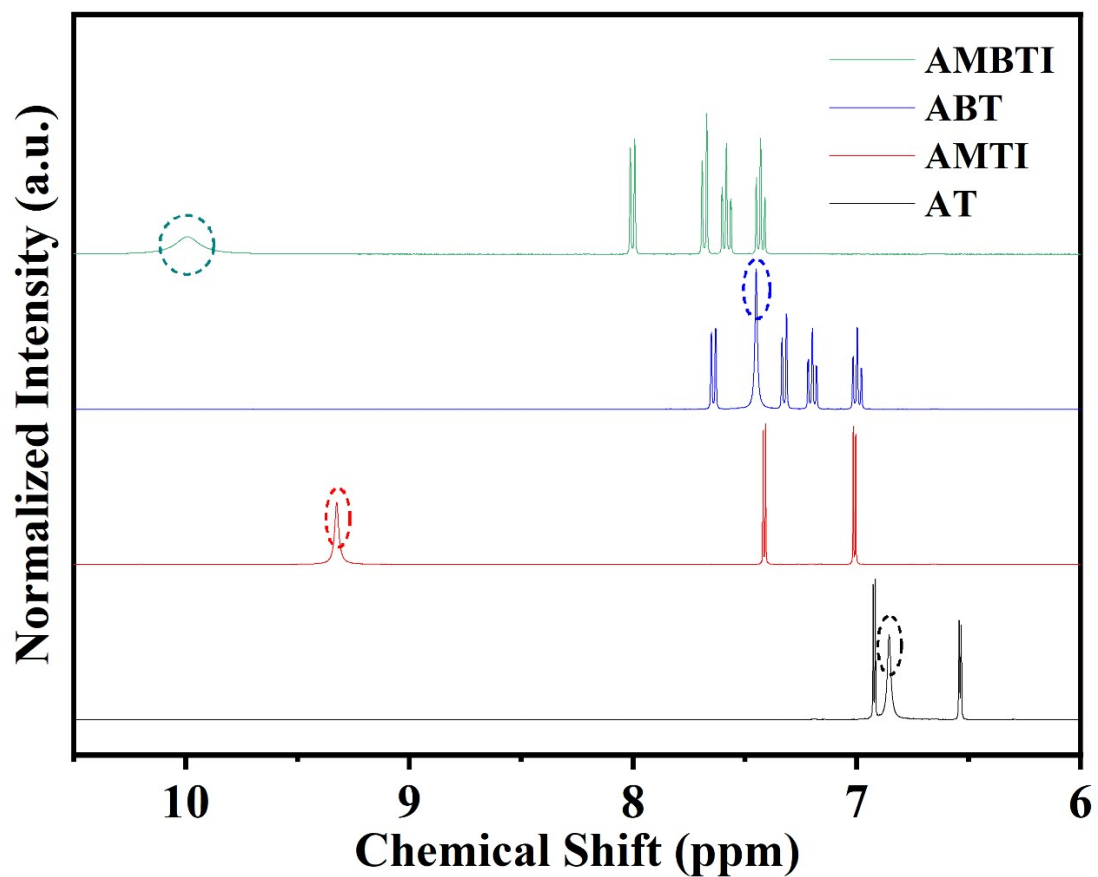

**Figure S1a** <sup>1</sup>H NMR spectra of AT, AMTI, ABT, and AMBTI in DMSO-d<sub>6</sub> solution at 400 MHz and 25°C. The dashed circles indicate amido. The concentrations of AT, AMTI, ABT, and AMBTI are all 0.04 M, and all spectra were calibrated using the DMSO-d<sub>6</sub> peak at 2.5 ppm.

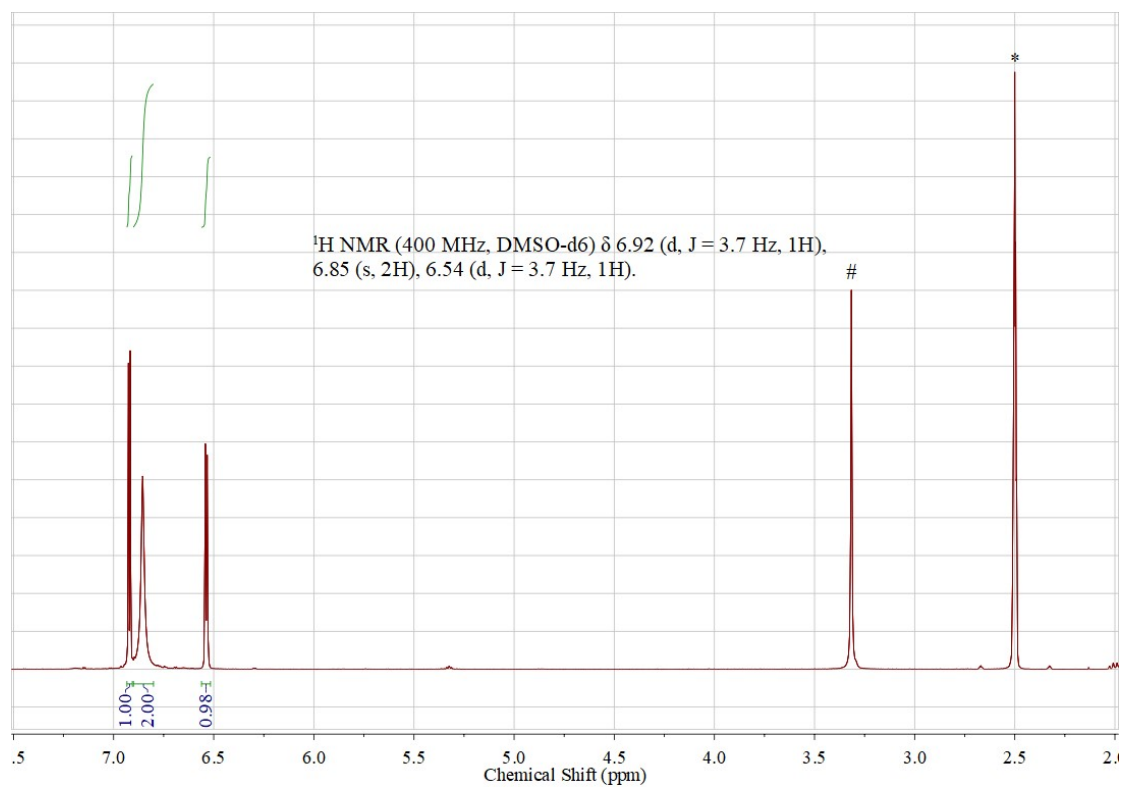

**Figure S1b**  $^1\text{H}$  NMR spectrum of AT in DMSO- $d_6$  solution at 400 MHz and 25°C.

“#” is the peak of water, and “\*” is the peak of DMSO.

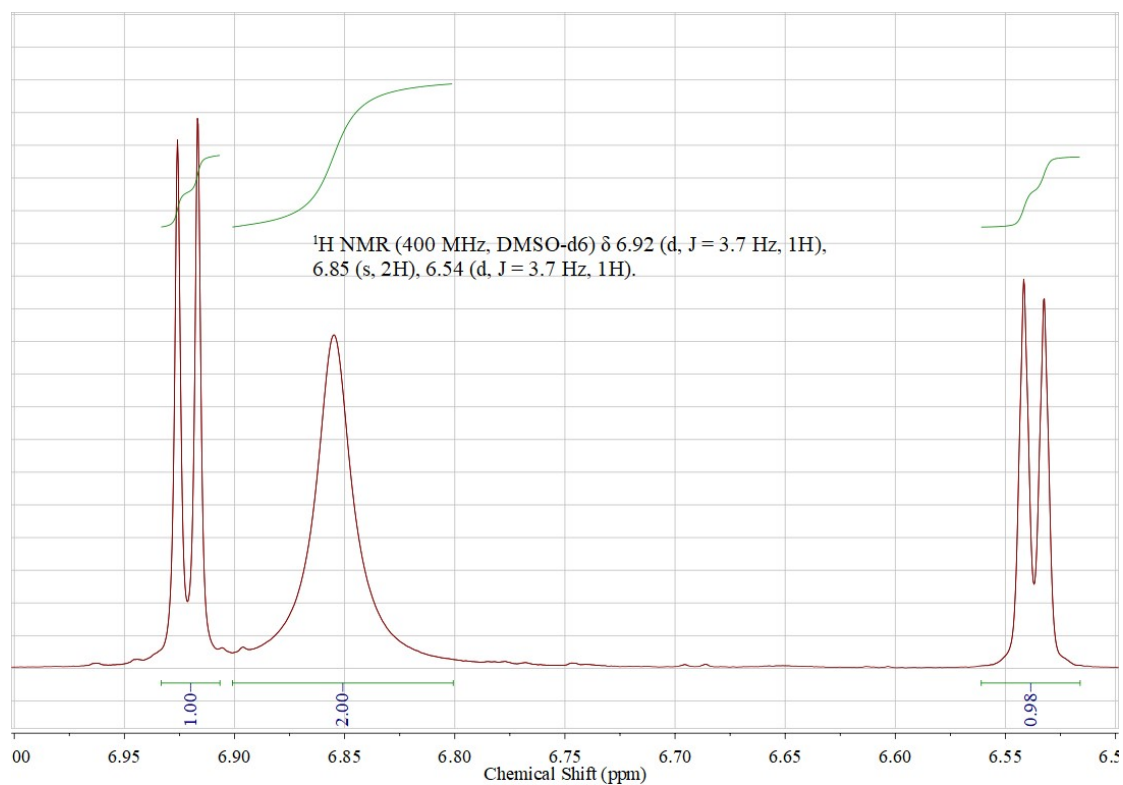

**Figure S1c**  $^1\text{H}$  NMR spectrum of AT in DMSO- $d_6$  solution at 400 MHz and 25°C (7.0 to 6.5).

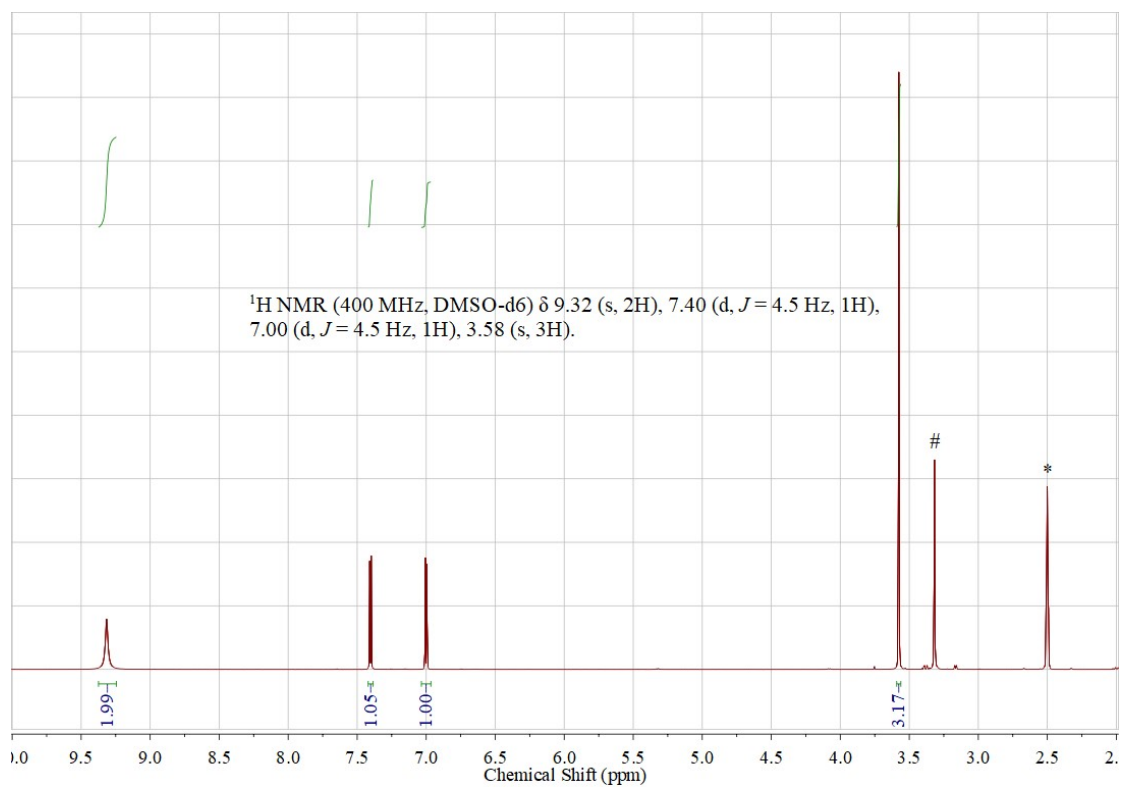

**Figure S1d**  $^1\text{H}$  NMR spectrum of AMTI in DMSO- $d_6$  solution at 400 MHz and 25°C. “#” is the peak of water, and “\*” is the peak of DMSO.

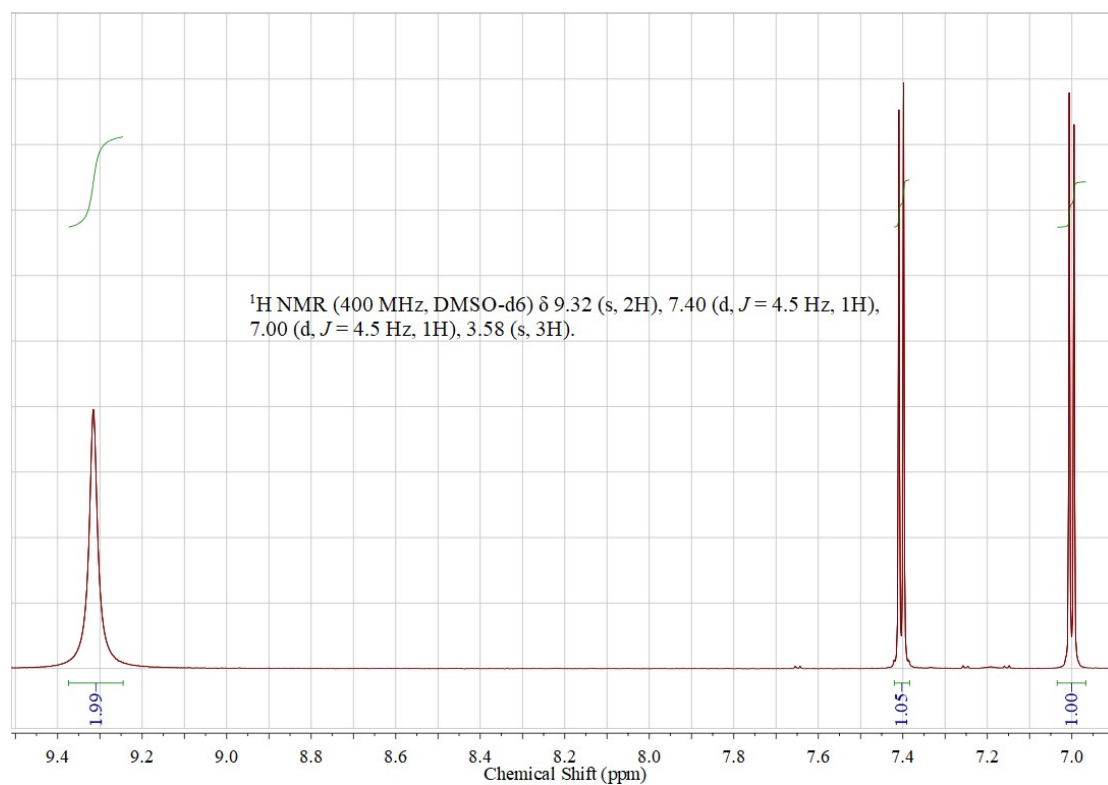

**Figure S1e**  $^1\text{H}$  NMR spectrum of AMTI in DMSO- $d_6$  solution at 400 MHz and 25°C (9.5 to 6.9).

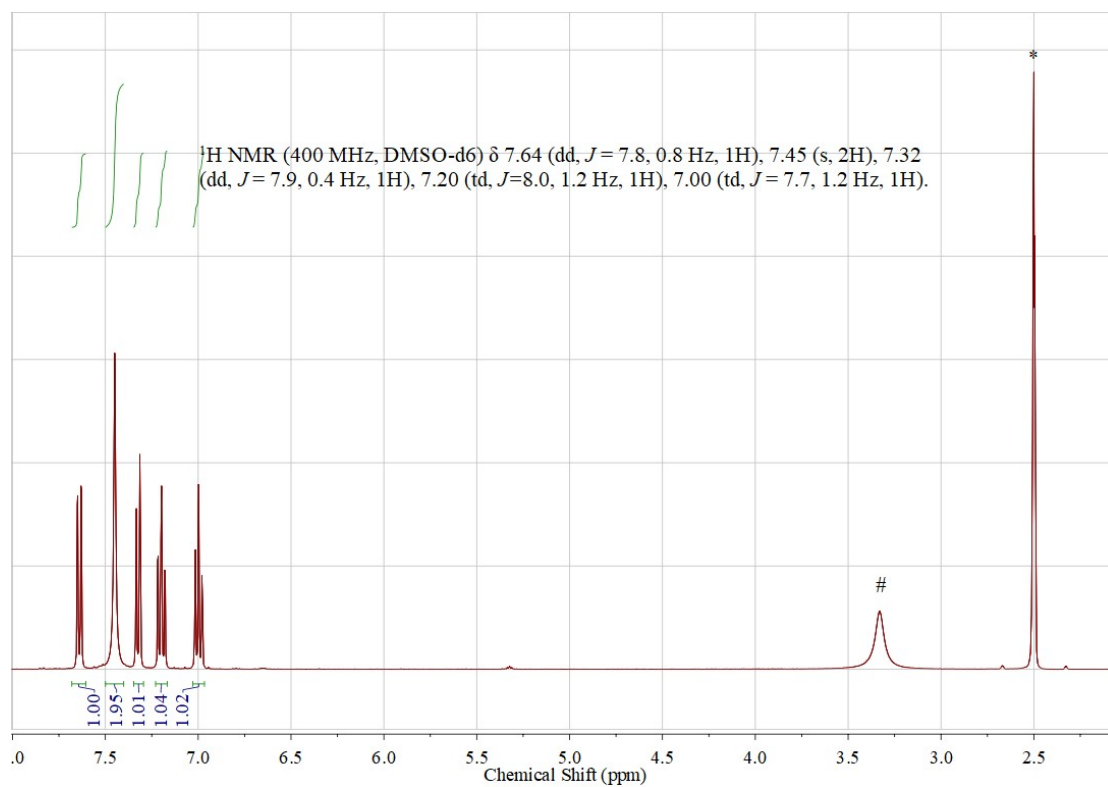

**Figure S1f** <sup>1</sup>H NMR spectrum of ABT in DMSO-d<sub>6</sub> solution at 400 MHz and 25°C.

“#” is the peak of water, and “\*” is the peak of DMSO.

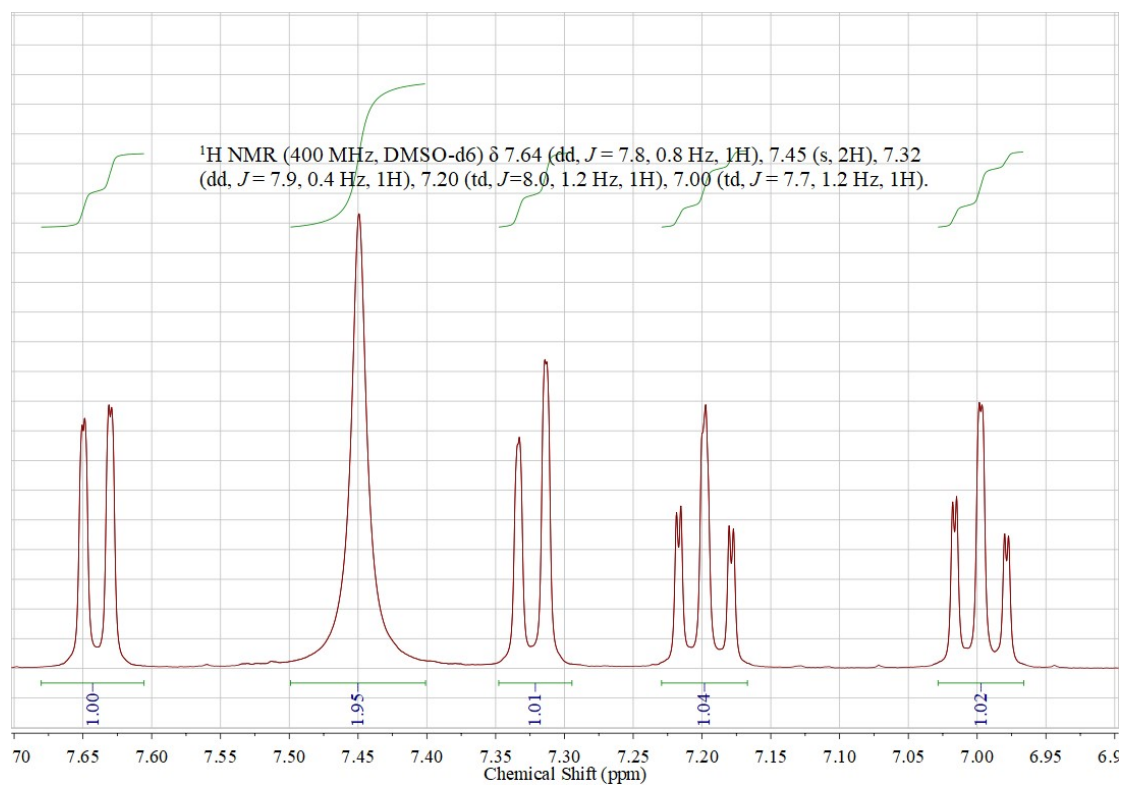

**Figure S1g** <sup>1</sup>H NMR spectrum of ABT in DMSO-d<sub>6</sub> solution at 400 MHz and 25°C

(7.7 to 6.9).

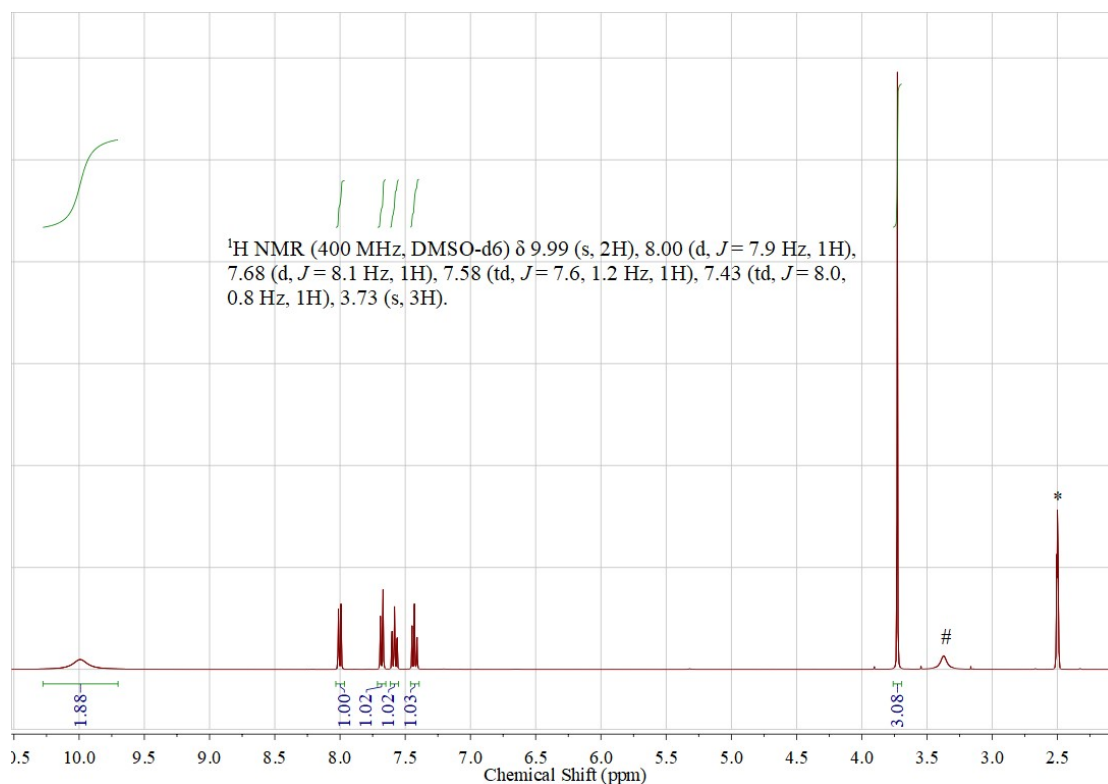

**Figure S1h** <sup>1</sup>H NMR spectrum of AMBTI in DMSO-d<sub>6</sub> solution at 400 MHz and 25°C. “#” is the peak of water, and “\*” is the peak of DMSO.

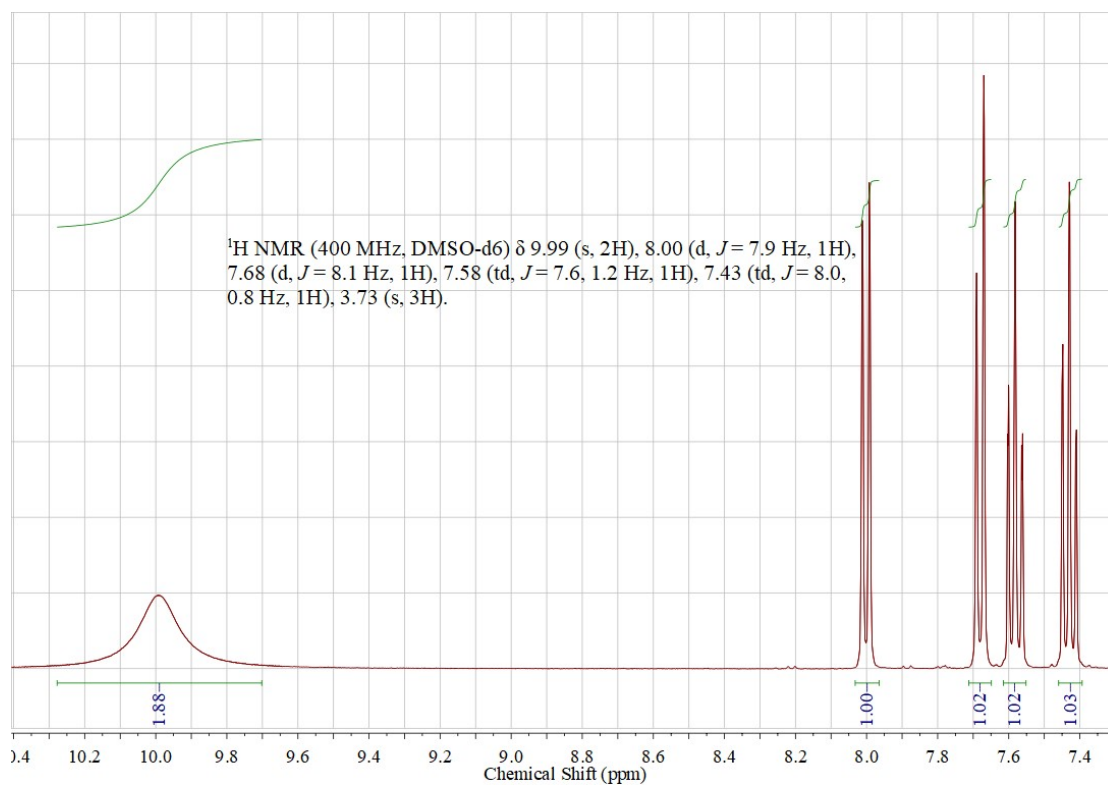

**Figure S1i** <sup>1</sup>H NMR spectrum of AMBTI in DMSO-d<sub>6</sub> solution at 400 MHz and 25°C (10.4 to 7.3).

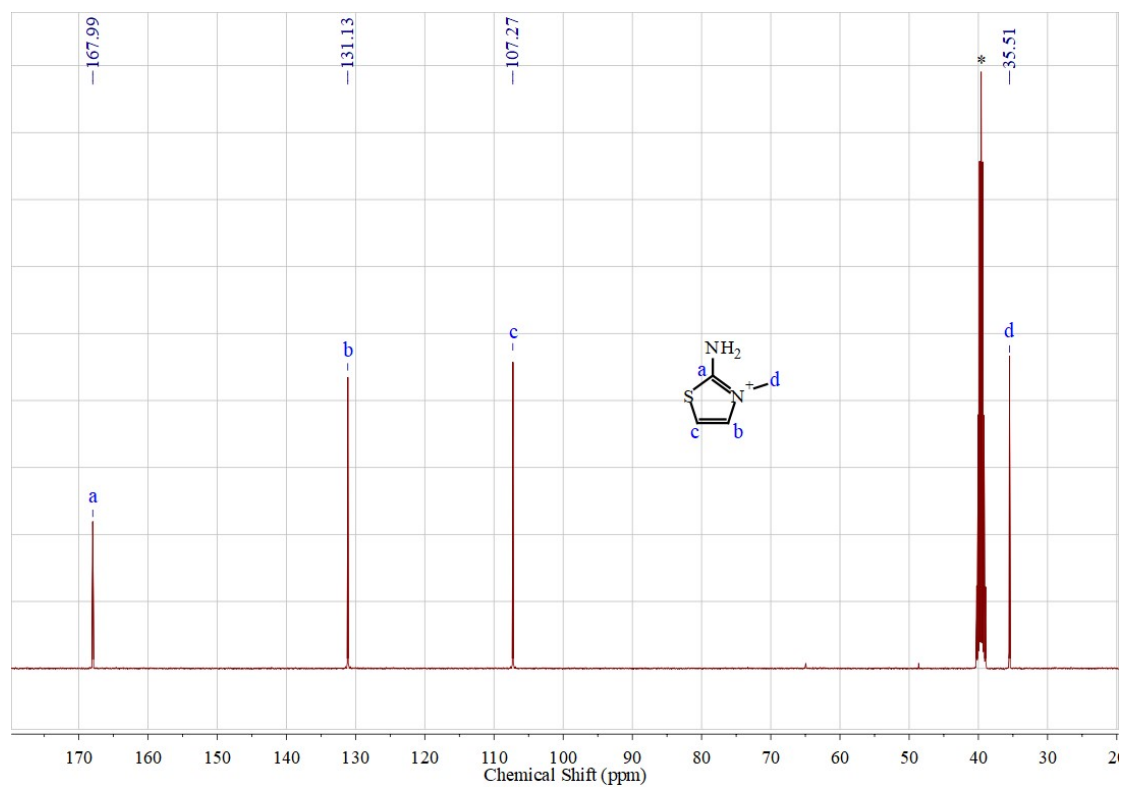

**Figure S1j.**  $^{13}\text{C}$  NMR spectrum of AMTI in DMSO- $\text{d}_6$  solution at 100 MHz and 25°C. “\*” is the peak of DMSO- $\text{d}_6$ .

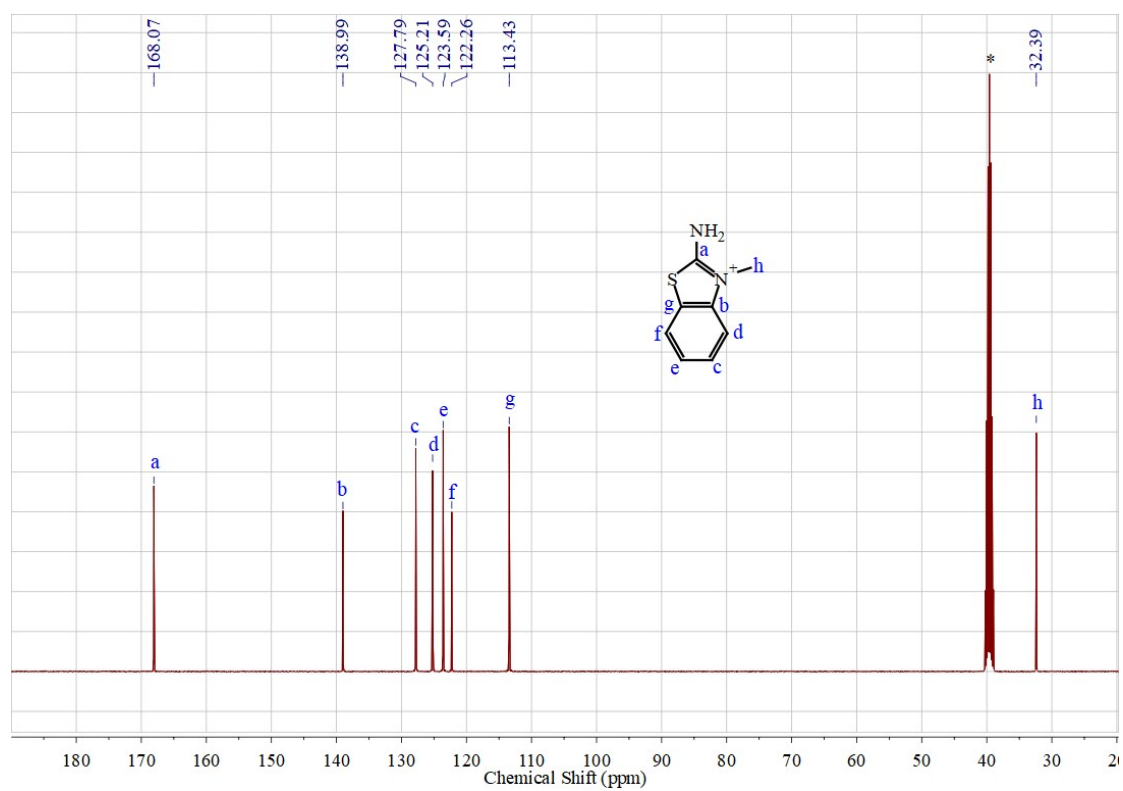

**Figure S1k.**  $^{13}\text{C}$  NMR spectrum of AMBTI in DMSO- $\text{d}_6$  solution at 100 MHz and 25°C. “\*” is the peak of DMSO- $\text{d}_6$ .

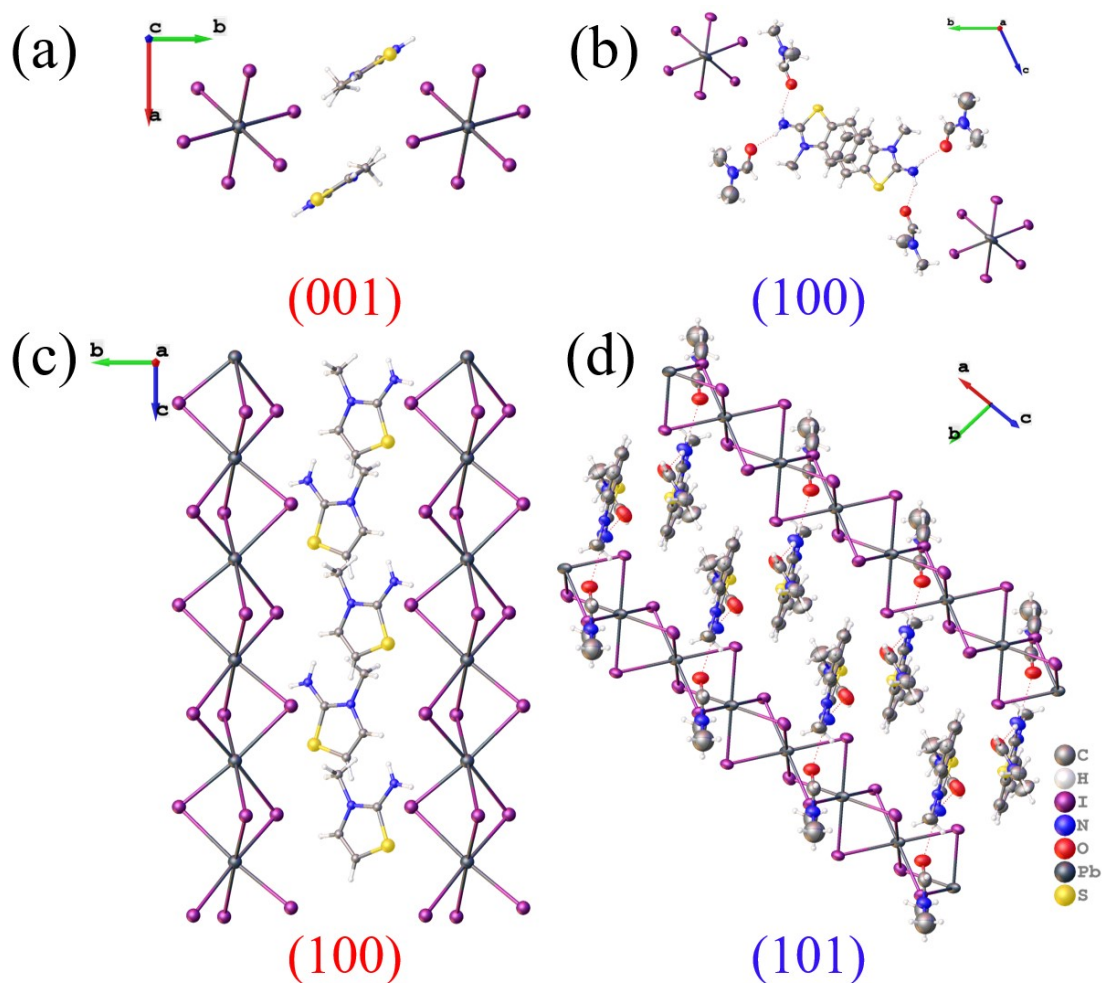

**Figure S2.** Crystal structures of (a, c) AMTPbI<sub>3</sub> and (b, d) AMBTPbI<sub>3</sub>·2DMF under different crystal planes

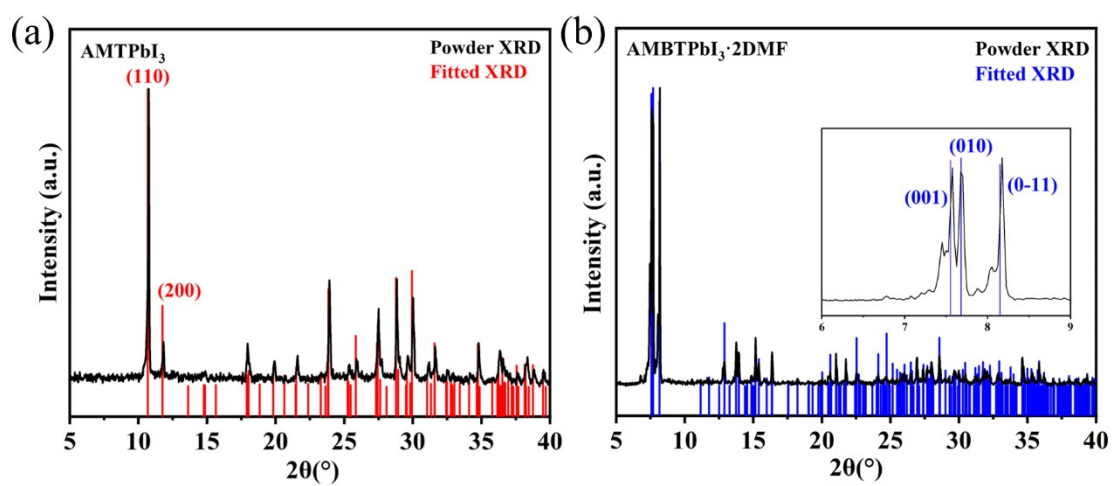

**Figure S3.** Powder XRD and fitted XRD of (a) AMTPbI<sub>3</sub> and (b) AMBTPbI<sub>3</sub>·2DMF

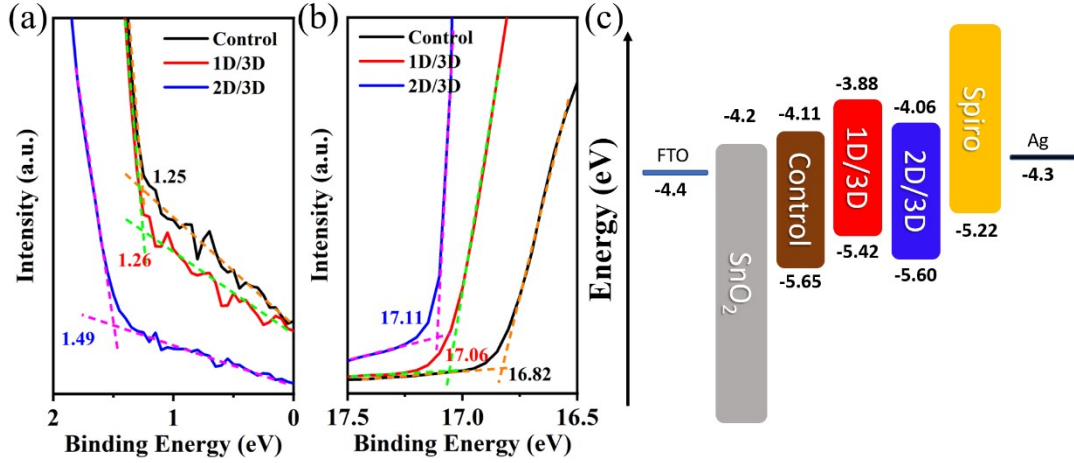

**Figure S4.** Ultraviolet photoelectron spectra (UPS) (a) start edge ( $E_{onset}$ ) and (b) cut-off edge ( $E_{cutoff}$ ) of control, 1D/3D, and 2D/3D films; (c) The energetic levels of all related materials

Equations S1-S3 show the relationship between  $E_F$  (Fermi level),  $E_{VB}$ , and  $E_{CB}$ .

$$E_F = E_{cutoff} - 21.22 \text{ eV} \quad (S1)$$

$$E_{VB} = E_F - E_{onset} \quad (S2)$$

$$E_{CB} = E_{VB} + E_g \quad (S3)$$

**Table S3.** Fitting parameters for the TRPL curves of perovskite films.

|         | $A_1$   | $\tau_1/\text{ns}$ | $A_2$   | $\tau_2/\text{ns}$ | $\tau_{ave}/\text{ns}$ |
|---------|---------|--------------------|---------|--------------------|------------------------|
| Control | 0.08708 | 48.11              | 0.87388 | 542.80             | 538.47                 |
| 1D/3D   | 0.12867 | 357.96             | 0.79985 | 1129.9             | 1092.56                |
| 2D/3D   | 0.18652 | 89.94              | 0.74865 | 717.05             | 698.05                 |

TRPL decay curves were fitted with equation (S4):

$$f(t) = A_1 e^{-\frac{t}{\tau_1}} + A_2 e^{-\frac{t}{\tau_2}} + B \quad (S4)$$

The average PL decay lifetime can be obtained using equation (S5):

$$\tau_{ave} = \frac{\sum_i^A \tau_i^2}{\sum_i^A \tau_i} \quad (S5)$$

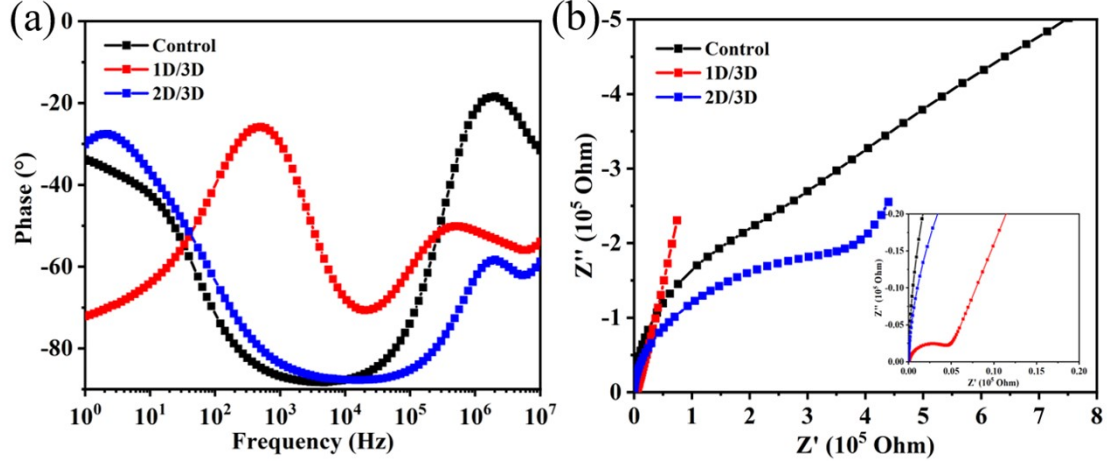

**Figure S5.** (a) Bode and (b) Nyquist plot of control, 1D/3D, and 2D/3D devices in dark state. The control device has minimum recombination impedance.

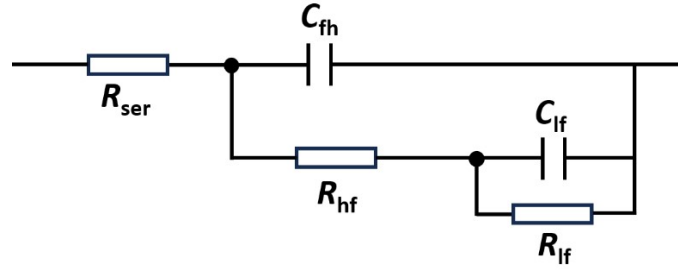

**Schematic S1.** Equivalent circuit of PSCs.

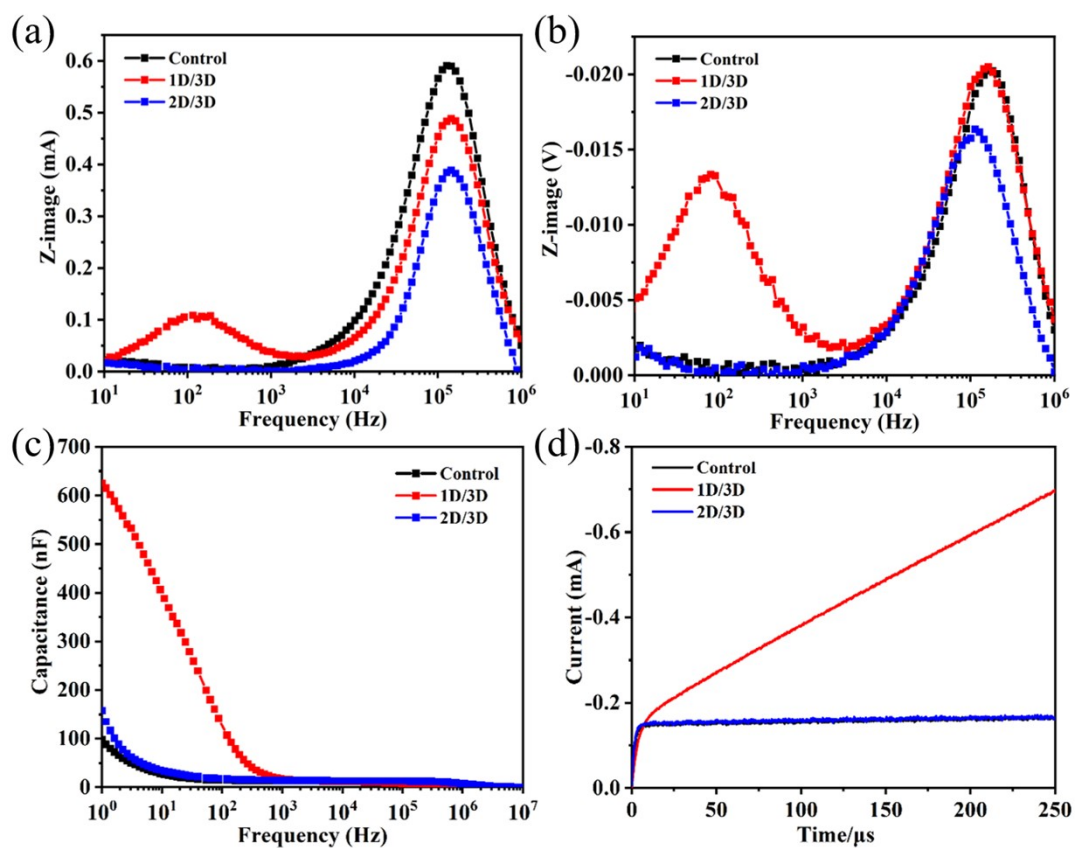

**Figure S6.** The spectrum of three kinds of devices of (a) IMPS, (b) IMVS, and (c) EIS (capacitance to frequency). (d) Dark-CELIV curves of three types of devices under the extraction voltage slope of 10 V/ms.

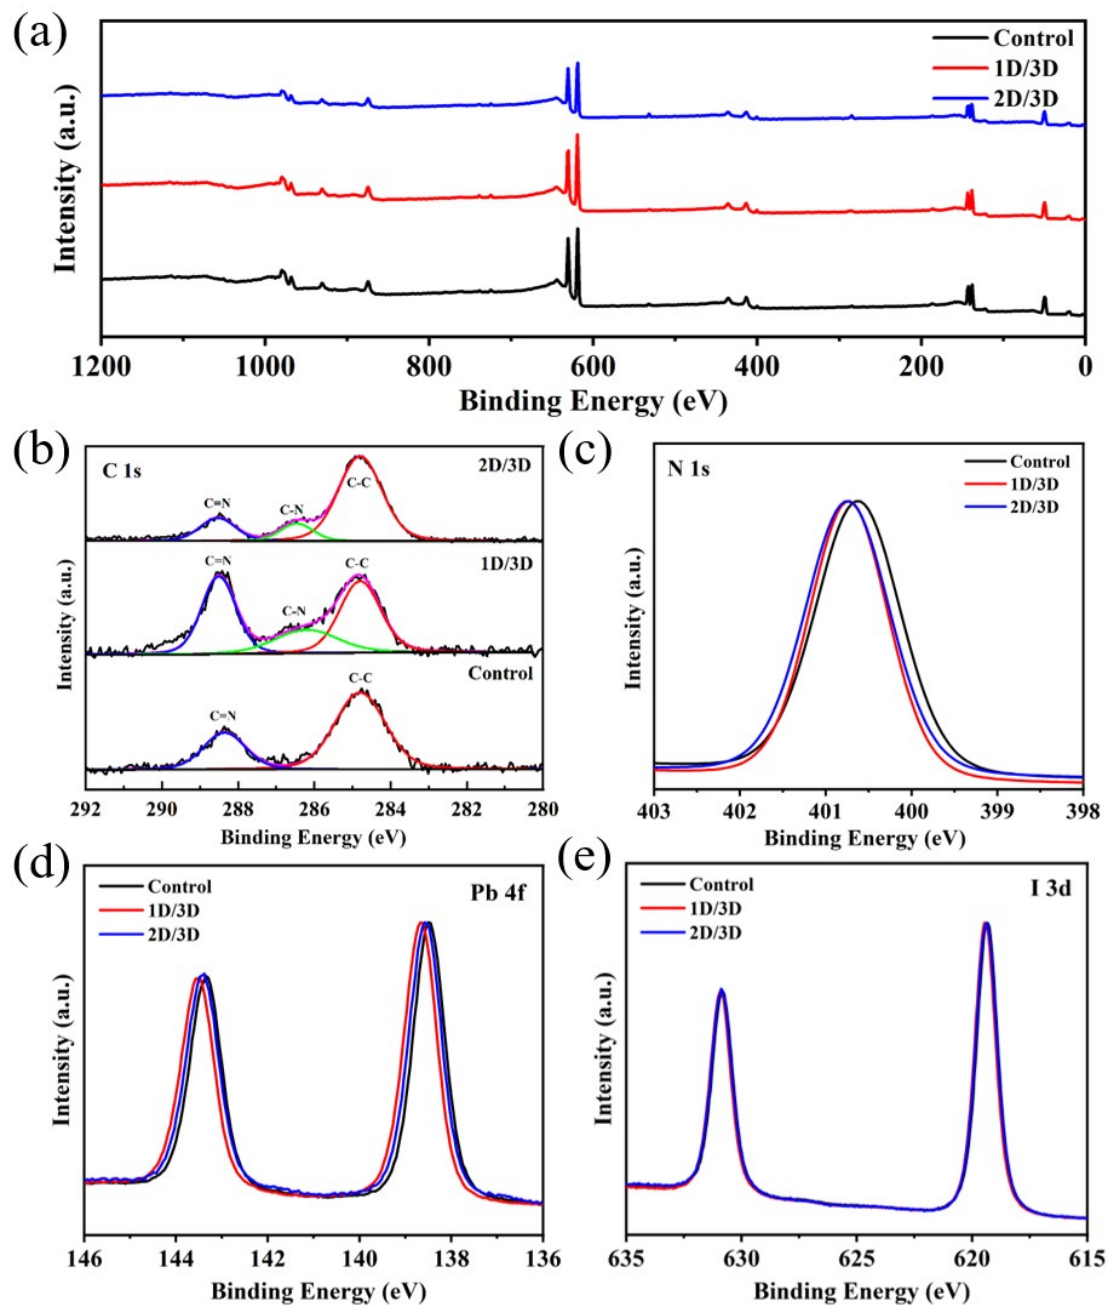

**Figure S7.** XPS spectra of (a) survey, (b) C 1s, (c) N 1s, (d) Pb 4f, and (e) I 3d.

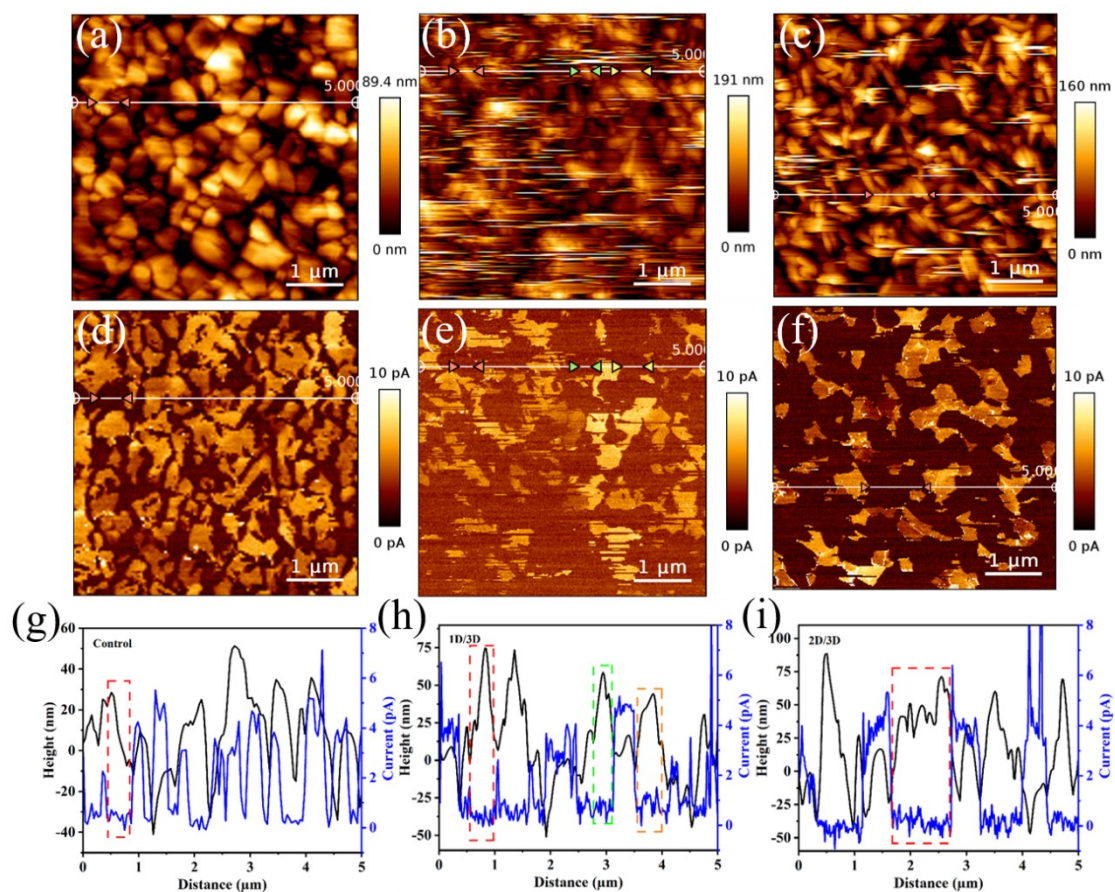

**Figure S8.** C-AFM topography, current mapping, and corresponding height and current curves along the white line based on (a, d, g) Control, (b, e, h) 1D/3D, and (c, f, i) 2D/3D. The area between the triangles corresponds to the dashed box, and the sample structure is FTO/SnO<sub>2</sub>/PVK.

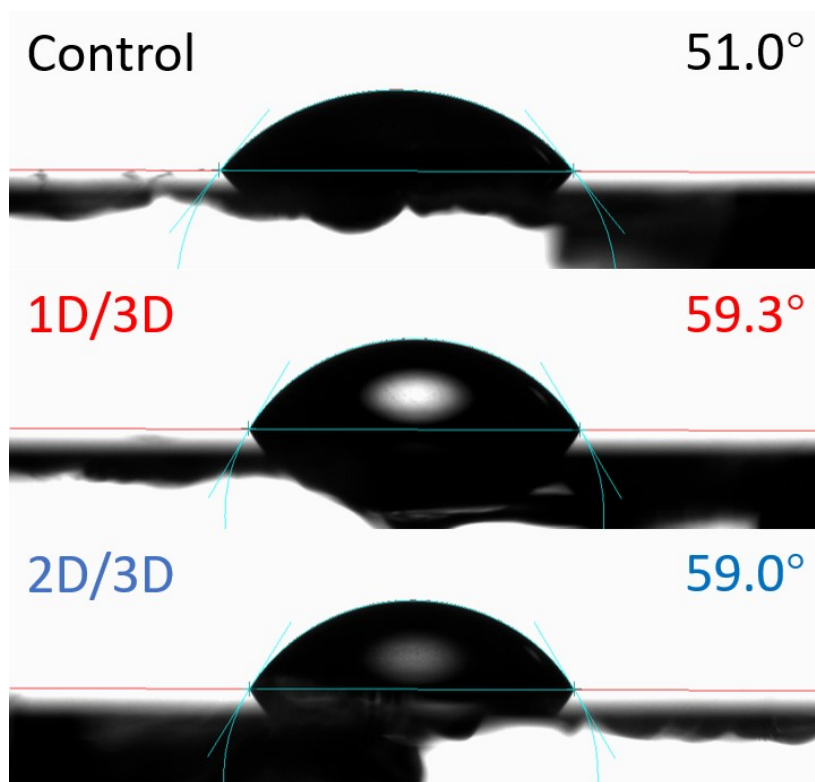

**Figure S9.** The water contact angle of PVK films of control, 1D/3D, and 2D/3D.

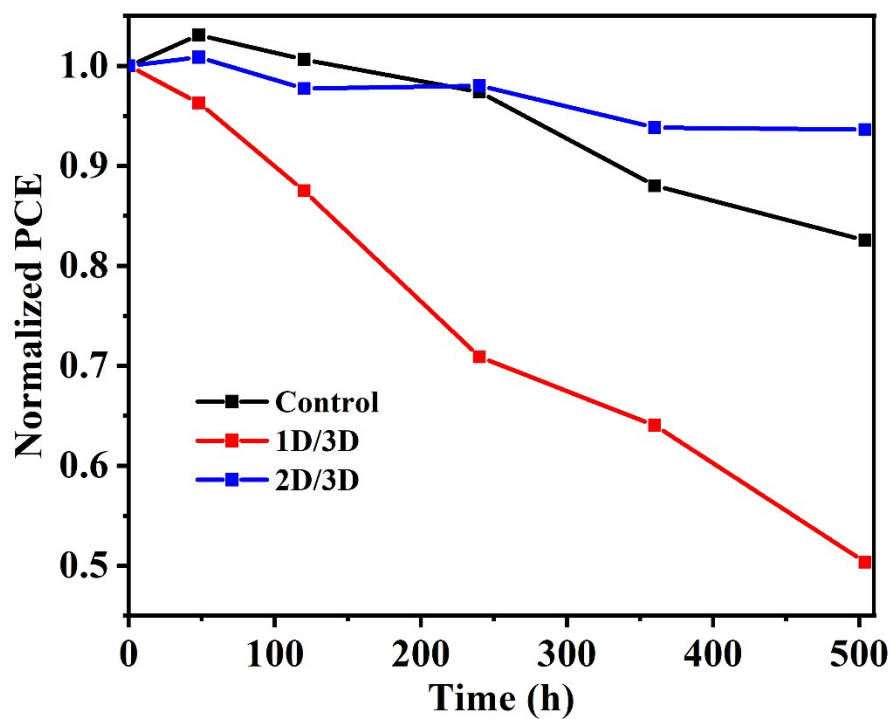

**Figure S10.** The long-term stability of three types of PSCs at 40% humidity.

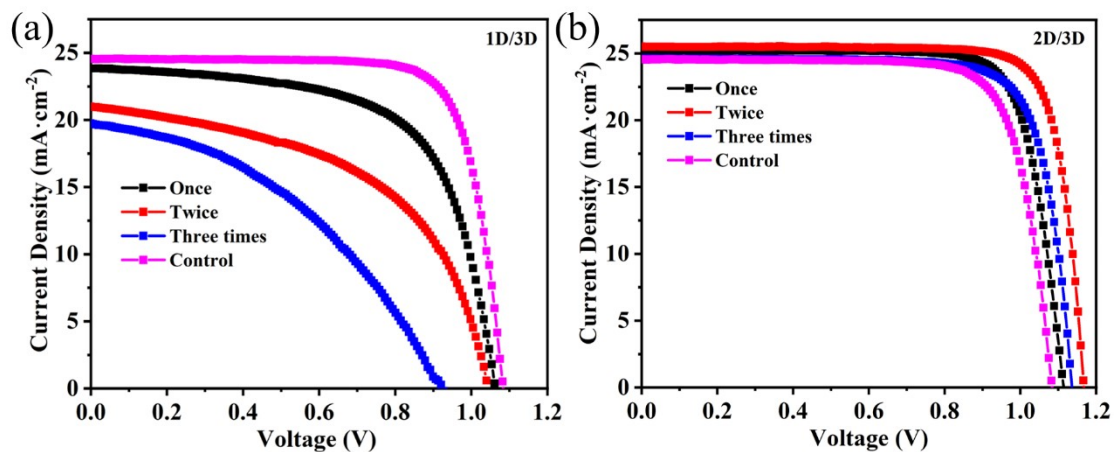

**Figure S11.** The  $J$ - $V$  performance of 1D/3D and 2D/3D PSCs with different number of modifications.

**Table S4.** The  $J$ - $V$  performance of 1D/3D and 2D/3D PSCs with different number of modifications.

| Number of modifications |             | $V_{oc}$ (V) | $J_{sc}$ ( $\text{mA}\cdot\text{cm}^{-2}$ ) | FF (%) | PCE (%) |
|-------------------------|-------------|--------------|---------------------------------------------|--------|---------|
| Control                 | /           | 1.083        | 24.56                                       | 77.17  | 20.52   |
| 1D/3D                   | Once        | 1.062        | 23.86                                       | 63.76  | 16.15   |
|                         | Twice       | 1.042        | 20.99                                       | 52.32  | 11.45   |
|                         | Three times | 0.921        | 19.69                                       | 41.28  | 7.49    |
| 2D/3D                   | Once        | 1.114        | 25.23                                       | 78.75  | 22.14   |
|                         | Twice       | 1.166        | 25.50                                       | 81.36  | 24.20   |
|                         | Three times | 1.135        | 24.63                                       | 78.38  | 21.92   |

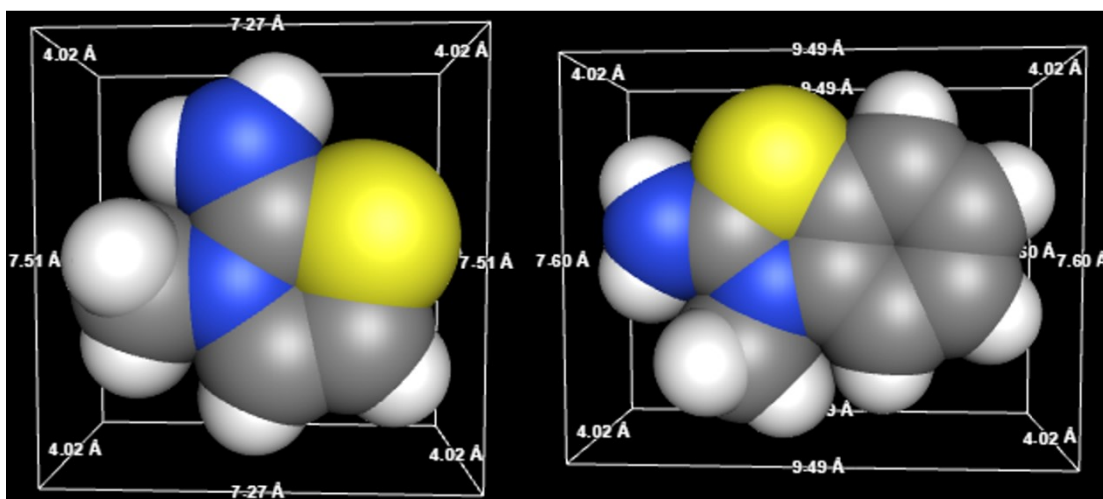

**Figure S12.** Ion size parameters of  $\text{AMT}^+$  and  $\text{AMBT}^+$ .

**Table S5.** Ion size parameters and corresponding tolerance factor of  $\text{AMT}^+$  and  $\text{AMBT}^+$

| Ion             | Size                              | Arithmetic mean | Geometric mean | Tolerance factor |
|-----------------|-----------------------------------|-----------------|----------------|------------------|
|                 |                                   | radius          | radius         |                  |
| $\text{AMT}^+$  | $7.267 \times 7.506 \times 4.018$ | 3.132           | 3.015          | 1.09             |
| $\text{AMBT}^+$ | $9.485 \times 7.603 \times 4.019$ | 3.518           | 3.309          | 1.15             |

**Table S6.** The  $J$ - $V$  performance of AMBTI/3D PSCs with different rotation speed.

|         | rotation speed | $V_{oc}$ (V)      | $J_{sc}$ ( $\text{mA} \cdot \text{cm}^{-2}$ ) | FF (%)         | PCE (%)        |
|---------|----------------|-------------------|-----------------------------------------------|----------------|----------------|
| Control | /              | $1.077 \pm 0.024$ | $24.82 \pm 0.45$                              | $73.6 \pm 3.0$ | $19.7 \pm 0.9$ |
| With 2  | 2000           | $1.072 \pm 0.016$ | $24.78 \pm 0.30$                              | $73.0 \pm 3.0$ | $19.4 \pm 1.0$ |
| mg/mL   | 4000           | $1.066 \pm 0.019$ | $24.77 \pm 0.61$                              | $73.6 \pm 2.7$ | $19.4 \pm 0.8$ |
| AMBTI   | 6000           | $1.076 \pm 0.014$ | $24.98 \pm 0.26$                              | $73.4 \pm 2.9$ | $19.7 \pm 0.8$ |

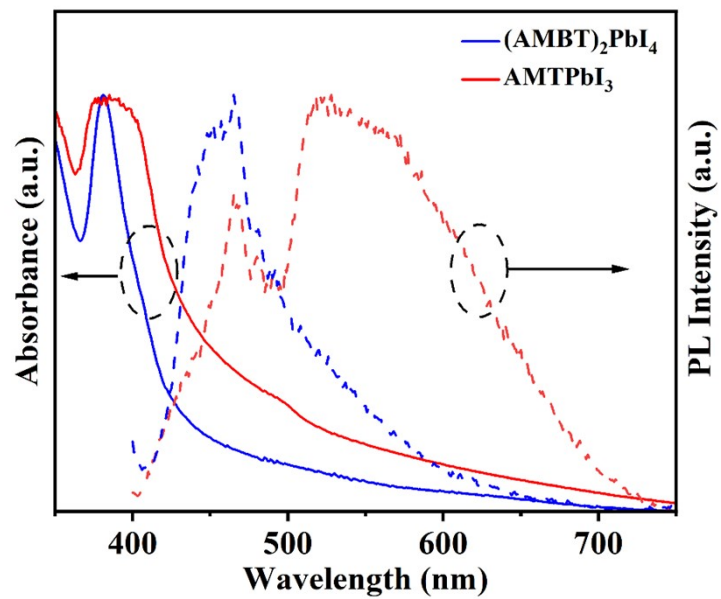

**Figure S13.**  $\text{AMTPbI}_3$  and  $(\text{AMBT})_2\text{PbI}_4$  absorption and fluorescence spectra.

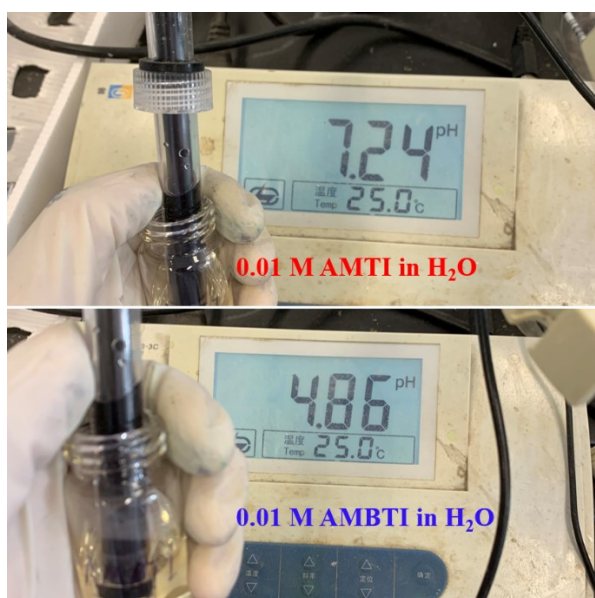

**Figure S14.** pH values of 0.01 M AMTI and AMBTI aqueous solutions.

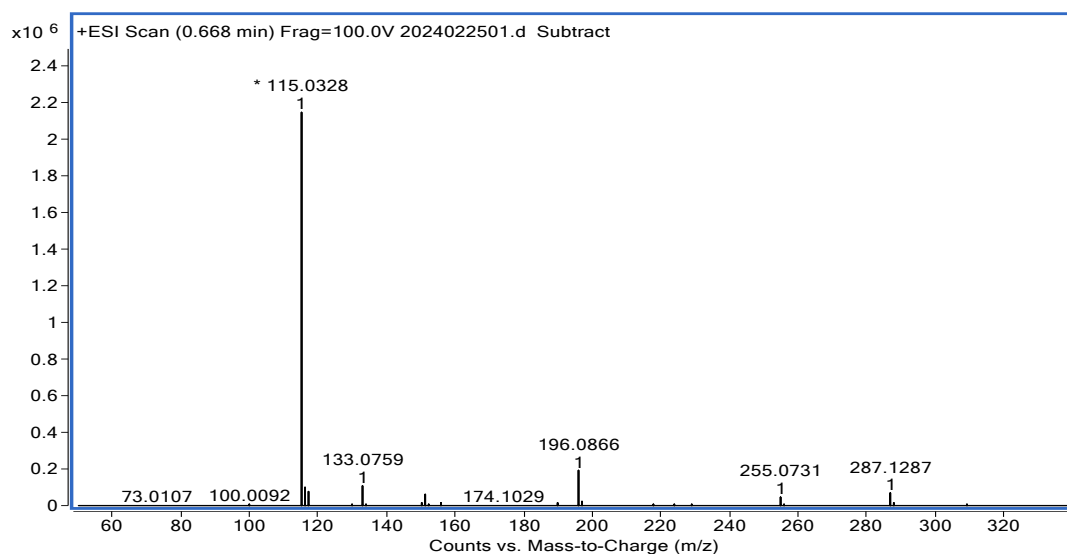

**Figure S15a.** High-resolution mass spectrum of AMT<sup>+</sup> (115.0328).

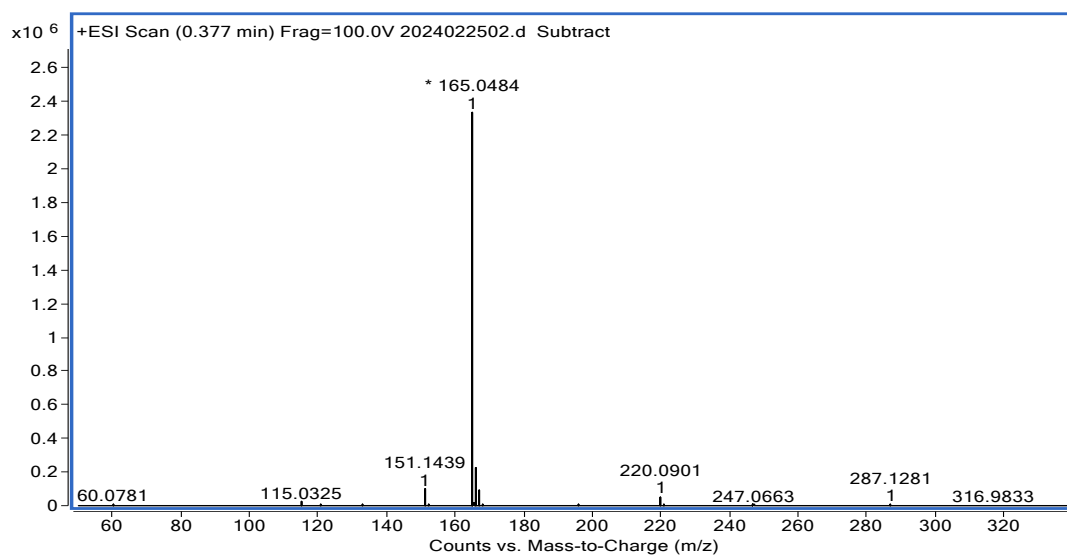

**Figure S15b.** High-resolution mass spectrum of AMBT<sup>+</sup> (165.0484).

## References

- (1) Kim, M.; Jeong, J.; Lu, H.; Lee, T. K.; Eickemeyer, F. T.; Liu, Y.; Choi, I. W.; Choi, S. J.; Jo, Y.; Kim, H.-B. et al. Conformal quantum dot-SnO<sub>2</sub> layers as electron transporters for efficient perovskite solar cells. *Science* **2022**, 375 (6578), 302.
